# Supplementary material for: Synergistic phenotypic adaptations of motile purple sulphur bacteria Chromatium okenii during lake-to-laboratory domestication
Source: PubMed Central journal article supplement (PMC11495639; doi:10.1371/journal.pone.0310265), 2024-10-22
Supplement: pone.0310265.s001.pdf [file pone.0310265.s001.pdf]

# Supporting Information

1  
2  
3  
4  
5  
6  
7  
8  
9  
10  
11  
12  
13  
14  
15  
16  
17  
18  
19  
20  
21  
22  
23

## **Phenotypic adaptations of motile purple sulphur bacteria *Chromatium okenii* during lake-to-laboratory domestication**

Francesco Di Nezio<sup>1,2</sup>, Irvine Lian Hao Ong<sup>3</sup>, René Riedel<sup>3</sup>, Arkajyoti Goshal<sup>3</sup>, Jayabrata Dhar<sup>4</sup>, Samuele Roman<sup>1,5</sup>, Nicola Storelli<sup>1,2</sup>, Anupam Sengupta<sup>3\*</sup>

<sup>1</sup> Institute of Microbiology, Department of Environment, Constructions and Design, University of Applied Sciences and Arts of Southern Switzerland (SUPSI), Mendrisio, Switzerland

<sup>2</sup> Microbiology Unit, Department of Plant Sciences, University of Geneva, Geneva, Switzerland.

<sup>3</sup> Physics of Living Matter Group, Department of Physics and Materials Science, University of Luxembourg, Luxembourg City, Luxembourg

<sup>4</sup> Department of Mechanical Engineering, National Institute of Technology, Durgapur, India

<sup>5</sup> Alpine Biology Center Foundation, Bellinzona, Switzerland

24 **S1 Text. Cell tracking.** Cell tracking was performed using ImageJ Particle Tracker 2D/3D  
25 plug-in. Images were analysed by intensity thresholding to determine cell locations and link  
26 their position in subsequent frames, obtaining the coordinates of the cells at each interval.  
27 Cell coordinates at each frame were then used to extract single trajectories and calculate  
28 the swimming speed. Only trajectories lasting longer than 1.5 s were considered for  
29 swimming speed analysis. *C. okenii* cell body length was used as a threshold to  
30 distinguish motile from non-motile cells. For lake-sampled and laboratory-grown cells body  
31 length was set to 10 and 8  $\mu\text{m}$ , respectively. Trajectories with a net displacement between  
32 1 and 12 body lengths (10 - 120  $\mu\text{m}$ ) and 0.5 and 4 body lengths (4 - 32  $\mu\text{m}$ ) were selected  
33 for lake-sampled and laboratory cells, respectively. Cells with lower displacements were  
34 considered non-motile. Filtering was performed using custom Python code, written using  
35 NumPy library. The final filtered trajectories ( $T$ ) were used to calculate speed at each time  
36 interval for each cell and values were averaged to obtain the mean swimming speed.  
37 Calculations were performed with custom Python code using NumPy and Pandas library.  
38 The swimming speeds ( $\mu\text{m s}^{-1}$ ) of a population were plotted as a distribution using  
39 matplotlib module. Cells with speeds less than 1 body length were considered non-motile  
40 ( $N$ ). To calculate the ratio of motile to non-motile cells ( $R$ ), total cell count ( $C$ ) of a  
41 population (obtained by counting cells in individual frames and then averaging over all  
42 frames) was noted. The number of motile cells ( $M$ ) was then obtained by subtracting  $N$   
43 from the total number of trajectories ( $T$ )

44

45

$$M = T - N$$

46 Finally,  $R$  was calculated as

47

$$R = \frac{M}{C}$$

48 To highlight differences between samples in terms of motility, we arbitrarily defined three  
 49 different regimes, according to cell swimming speed: no/low motility ( $< 5 \mu\text{m s}^{-1}$ ), medium  
 50 motility ( $5 - 20 \mu\text{m s}^{-1}$ ), and high motility ( $> 20 \mu\text{m s}^{-1}$ ).

51

52 **S2 Text. Quantification of cellular mass density.** The parameters used in the following  
 53 calculations are:

|           |                  |              |                     |            |                       |
|-----------|------------------|--------------|---------------------|------------|-----------------------|
| $M_{cyt}$ | Mass of the      | $\rho_{cyt}$ | Density of the      | $V_{cell}$ | Volume of the cell    |
| t:        | cytoplasm        | :            | cytoplasm           |            |                       |
| $M_o$ :   | Mass of the SGBs | $\rho_o$ :   | Density of the SGBs | $V_o$ :    | Volume of the<br>SGBs |

54 We define total cell mass as:

$$55 \quad M_{cell} = M_{cyt} + M_o \quad (1)$$

56 where  $M_{cyt}$  and  $M_o$  are the mass of cytoplasm and sulfur globules, respectively. These can  
 57 be expressed as:

$$58 \quad M_o = V_o \cdot \rho_o$$

$$59 \quad M_{cyt} = (V_{cell} - V_o)\rho_{cyt}$$

60 where  $V_o$  and  $\rho_o$  are the volume and density of SGBs while  $\rho_{cyt}$  is the density of the  
 61 cytoplasm. Therefore, Equation (1) can be rewritten as:

$$62 \quad M_{cell} = (V_{cell} - V_o)\rho_{cyt} + V_o \cdot \rho_o \quad (2)$$

63 which after simplification,  $V_o$  can be converted into:

$$64 \quad M_{cell} = (V_{cell} \cdot \rho_{cyt}) + V_o(\rho_o - \rho_{cyt}). \quad (3)$$

65 Assuming SGBs to have a spherical shape and cells a spherocylindrical geometry,  $V_o$   
 66 equals  $\frac{4}{3}\pi r^3$  and  $V_{cell}$  equals  $\pi R^2[(h - 2R) + \frac{4}{3}R]$ , Equation (3) becomes:

$$67 \quad M_{cell} = (\pi R^2[(h - 2R) + \frac{4}{3}R]) \cdot \rho_{cyt} + \frac{4}{3}\pi \sum_i^n r_i^3 (\rho_o - \rho_{cyt}) \quad (4)$$

68 where the summation indicates the sum of the volumes of the  $n$  SGBs inside a single cell.

69 Dividing Equation (4) by the cell volume, the effective density of the cell can be obtained:

$$70 \quad \rho_{eff} = \rho_{cyt} + \frac{\frac{4}{3}\pi \sum_i^n r_i^3 (\rho_o - \rho_{cyt})}{V_{cell}}. \quad (5)$$

71 The fraction of the density of the cell accounted for by the SGBs is therefore represented

72 by the term  $\frac{4}{3}\pi \sum_i^n r_i^3 (\rho_o - \rho_{cyt})$ .

73

74 **S3 Text. Modelling mechanics.** A cell generates a pusher-like propulsive force,  $\mathbf{P}$   
75 (because of its flagellar dynamics) to maintain its active motion. The weight of the cell (due  
76 to combined influence of the SGBs, and the rest of the cell biomass, approximated by  
77 cytoplasmic density), and the upthrust on the cell due to the finite cellular volume act in  
78 opposite directions. In addition, the cell motion induces a viscous drag ( $\mathbf{D}$ , opposite to the  
79 swimming direction) that scales with the cell morphology and swimming speed. Torques  
80 on the cell structure are calculated about its centroid (or center of buoyancy,  $C_B$ , Fig 2A).  
81 The torque contributions on the cell mechanics are the following: effective torque due to  
82 the SGBs (when their effective center of mass does not coincide with  $C_B$ ), the torque  
83 originating from the viscous drag (in case of asymmetric cellular geometry), and resistive  
84 (viscous) torque due to cell rotation (with rotation speed  $\omega$ ). Based on the physical  
85 considerations described in Fig 2a, following equations emerge from the balance of the  
86 forces and the torques:

$$87 \quad P \sin \varphi = D \sin \theta$$

$$88 \quad P \cos \varphi - D \cos \theta = (\rho_{cell} - \rho_{fluid}) V g = (\rho_{cyt} - \rho_{fluid}) V_C g + (\rho_o - \rho_{cyt}) V_O g \quad (6)$$

$$89 \quad -W \sin(\varphi) L_W = R \eta \omega$$

90 The symbols  $\rho$ ,  $V$ ,  $W$ ,  $\eta$  and  $L_W$  denotes the density, volume, weight, medium viscosity,  
91 and distance from cell centroid respectively. Some of the symbols carry the subscripts *cyt*,  
92 *fluid*, *C*, *H*, and *N* which, respectively, refers to the cytoplasm, surrounding medium (within

93 which the cell swims), the cell, the hydrodynamic center of the cell (which coincides with  
 94 the cell centroid due to its symmetrical shape), and the SGBs. Density of the cell ( $\rho_{\text{cell}}$ ) is  
 95 given by  $\rho_{\text{fluid}}$  times  $\text{sp}_{\text{cell}}$ , where  $\text{sp}_{\text{cell}}$  is the overall specific gravity of the cell.  $\varphi$  is the  
 96 angle between the line of action of the propulsion force,  $\mathbf{P}$  (originating due to the flagellar  
 97 motion) and the line of action of the gravity vector. Here  $\omega$ ,  $\varphi$  and  $\mathbf{P}$  are unknowns, which  
 98 need to be determined as part of the solution. The motion of the cell does not follow the  
 99 line of action of  $\mathbf{P}$ , hence an angular offset  $\theta$  (an experimentally observable parameter)  
 100 with the vertical direction is assumed along which the cell moves (Fig 2).  $\varphi_N$  is the angle  
 101 between the direction of the gravity (downward, in the plane of the Fig) and the line joining  
 102  $C_O$  and  $C_B$  (note  $\varphi = \varphi_N$ , since we assume the center of gravity of the organelle to lie on the  
 103 major axis).  $\varphi_O$  is the angle between the direction of gravity (vertical line) and the line  
 104 joining  $C_O$  and  $C_B$  (note  $\varphi = \varphi_O$ , since we assume the center of gravity of the organelle to  
 105 lie on the major axis).  $\mathbf{D}$  denotes the drag force whose knowledge requires the detail of the  
 106 cellular geometry and its interaction to the surrounding fluid, the details of which are  
 107 provided in S3 Text.

108

109 **S4 Text. Stability of swimming cells.** We describe the axisymmetric cell geometry with  
 110 the generic equation

$$111 \quad r = \frac{ab}{\sqrt{(b^2 \cos^2 \gamma + a^2 \sin^2 \gamma) \cos^2 \psi + a^2 b^2 \sin^2 \psi}} + c \sin \psi$$

112 where the symbols  $a$ ,  $b$  ( $a > b$ ),  $\psi$  ( $-\frac{\pi}{2} < \psi < \frac{\pi}{2}$ ), and  $\gamma$  ( $0 < \gamma < 2\pi$ ) represent the major axis  
 113 length, minor axis length (equal to the semi-major axis length), polar angle, and azimuth  
 114 angle, respectively. Here  $c$  implies the deviation from the symmetric shape along the major  
 115 axis (fore–aft direction) and  $r$  denotes the position vector of the points on the cell surface  
 116 (from the origin) as a function of the polar and azimuth angles. With respect to the cell  
 117 geometry,  $a$  denotes the full length, and  $b$  the width of the cell.

118 The fore-aft asymmetry (value of  $c$ ) is quantified using the phase-contrast microscopy  
 119 images of the cells whose contours are fitted with Equation (6) and  $\gamma = 0$ , resulting in the  
 120 form  $r = \frac{ab}{\sqrt{b^2 \cos^2 \psi + a^2 \sin^2 \psi}} + c \sin \psi$ . Note that for a symmetric cell geometry ( $c = 0$ ), the  
 121 hydrodynamic center ( $C_H$ ) falls on the cell centroid ( $C_B$ ), and  $L_H$  vanishes. With the  
 122 consideration that the cell shape may be assumed as a prolate spheroid, the drag of a  
 123 symmetric prolate ellipsoid is expressed as  $D_{\parallel, \perp} = 6\pi\eta r_{eq} U K_{\parallel, \perp}$  where  $U$  and  $K$  are the  
 124 translational velocity and the shape factor, respectively, while  $\parallel$  ( $\perp$ ) denotes the parallel  
 125 (perpendicular) direction with respect to the major axis.

126 The shape factors have the form  $K_{\parallel} = \frac{4(t^2-1)^{\frac{3}{2}}}{3t^{\frac{1}{3}}\{(2t^2-1)\ln[t+(t^2-1)^{\frac{1}{2}}]-t(t^2-1)^{\frac{1}{2}}\}}$  and  $K_{\perp} =$

127  $\frac{8(t^2-1)^{\frac{3}{2}}}{3t^{\frac{1}{3}}\{(2t^2-3)\ln[t+(t^2-1)^{\frac{1}{2}}]+t(t^2-1)^{\frac{1}{2}}\}}$  for prolate spheroids [34,35] where  $t = a/b$ . The net drag on

128 the cell is dictated by its orientation and is given by  $D = D_{\parallel} \cos(\alpha) + D_{\perp} \sin(\alpha)$  ( $D_{\parallel}$  and  $D_{\perp}$  are  
 129 the drag forces parallel and perpendicular to the major axis of the cell shape, respectively,  
 130 and  $\alpha = \theta - \varphi$ ).

131  $R$  represent the coefficient of hydrodynamic rotational resistance and has the form

132  $R = C_R \frac{2(t^2+1)(t^2-1)^{\frac{3}{2}}}{3t\{(2t^2-1)\ln[t+(t^2-1)^{\frac{1}{2}}]-t(t^2-1)^{\frac{1}{2}}\}}$  (1) where  $C_R = 8\pi r_{eq}^3$ . With  $R$  defined, the viscous torque

133 on a prolate spheroid is estimated using  $\tau = R\eta\omega$  where  $\omega$  is the angular rotation rate

134 (rad/s). Our aim is to obtain the angular rotation rate  $\omega$  from the above set of three coupled

135 equations (Equation 1). Using the experimentally known values (Table 1), we draw a

136 stability phase-plot (see Fig 3A) that enlists the value of the angular rotation rate as a

137 function of the cell aspect ratio ( $a/b$ ) and the ratio between the position of the cell center of

138 weight (depending on the effective SGBs position) and the length of the long axis ( $L_W/a$ ).

139 The stability phase plots demarcate the regions of stable up-swimmers from stable down-

140 swimmers, thereby covering a spectrum of swimming stability conditions of *C. okenii* cells  
141 representing diverse physiological conditions.

142

143 **S5 Text. Phototaxis experiment.** Phototactic behaviour was observed in previously dark  
144 incubated cells after 30 min of localized LED illumination at two different light intensities  
145 (14.6 and 4.4  $\mu\text{mol m}^{-2} \text{s}^{-1}$  PPF; Fig S8). In both light regimes, *C. okenii* showed a larger  
146 ratio of highly motile cells in the illuminated sector of the millifluidic chamber, whereas in  
147 the shaded one, cells mainly fell into the low- and medium-speed regimes. In particular,  
148 the highly motile cells were substantially more when light was lower (4.4  $\mu\text{mol m}^{-2} \text{s}^{-1}$   
149 PPF; S8B Fig), when we also observed a larger fraction of motile vs non motile cells  
150 (S8C Fig). Analysis of wild cell distribution revealed a significant difference in cell  
151 abundance between the illuminated and the shaded region at 4.4  $\mu\text{mol m}^{-2} \text{s}^{-1}$  PPF, while  
152 no difference was observed after exposure to higher light intensity (14.6  $\mu\text{mol m}^{-2} \text{s}^{-1}$   
153 PPF; S8A Fig).

154

155 **S6 Text. Alternative calculation of the spherocylinder aspect ratio.** If we use the  
156 spherocylinder aspect ratio as the ratio between the radius of the spherical cap and the  
157 half length of the central body cylinder, the error becomes lesser. In this case, however,  
158 the total length of the cell for the spheroid and the spherocylinder does not remain the  
159 same. For spheroid the cell length is  $a$  (major axis) while for spherocylinder the cell length  
160 is  $(a+b)/2$ . In that case the error plots are shown in S4 Fig.

161

162

163

164

165

166

167

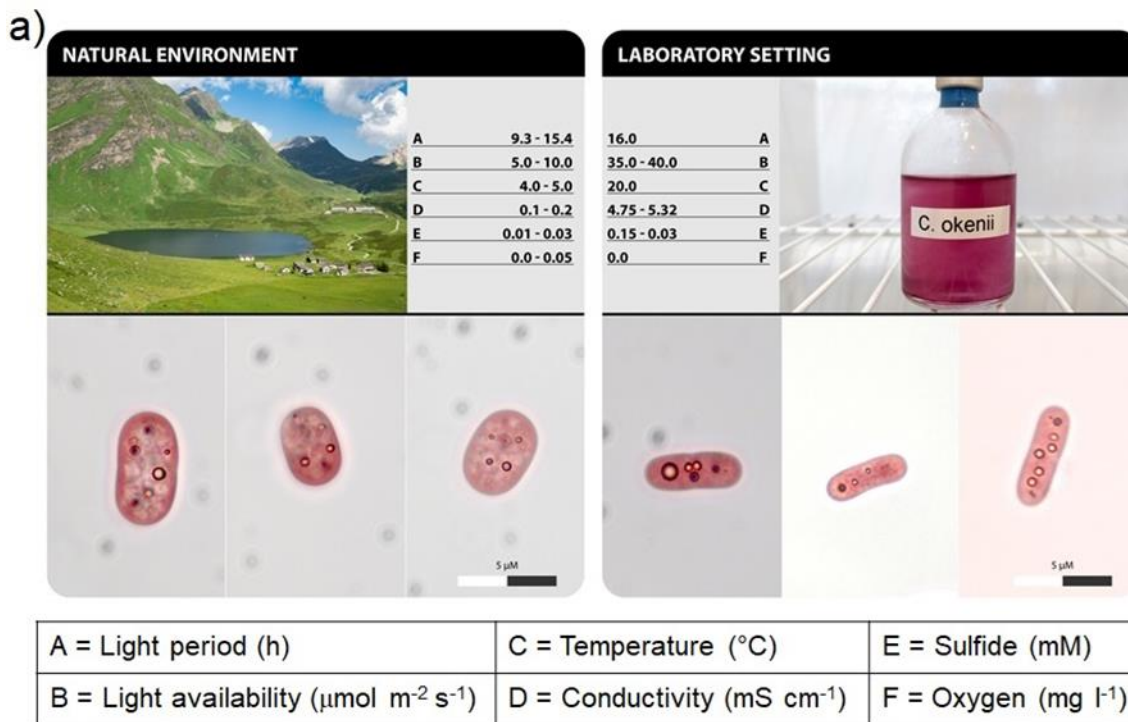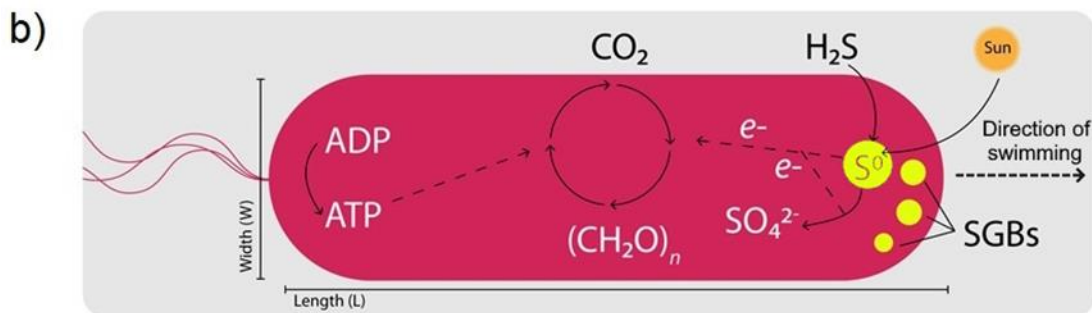

168

169

170 **Fig S1. Difference in the physicochemical parameters measured between natural and**  
 171 **artificial environments. a)** Upper half – Different values of the main abiotic factors (A-F)

172 influencing the growth of *C. okenii* in the natural and laboratory environment; numbers

173 represent seasonal ranges. Lower half – light photomicrographs showing morphological

174 differences between wild and domesticated *C. okenii* cells. **b)** Schematics of energy and

175 reducing power synthesis in anoxygenic phototrophs. Yellow circles represent the sulfur

176 globules inside the cells produced from the oxidation of  $\text{H}_2\text{S}$ . Length, width and SGBs

177 number are the main features used to characterize cell morphology



a)

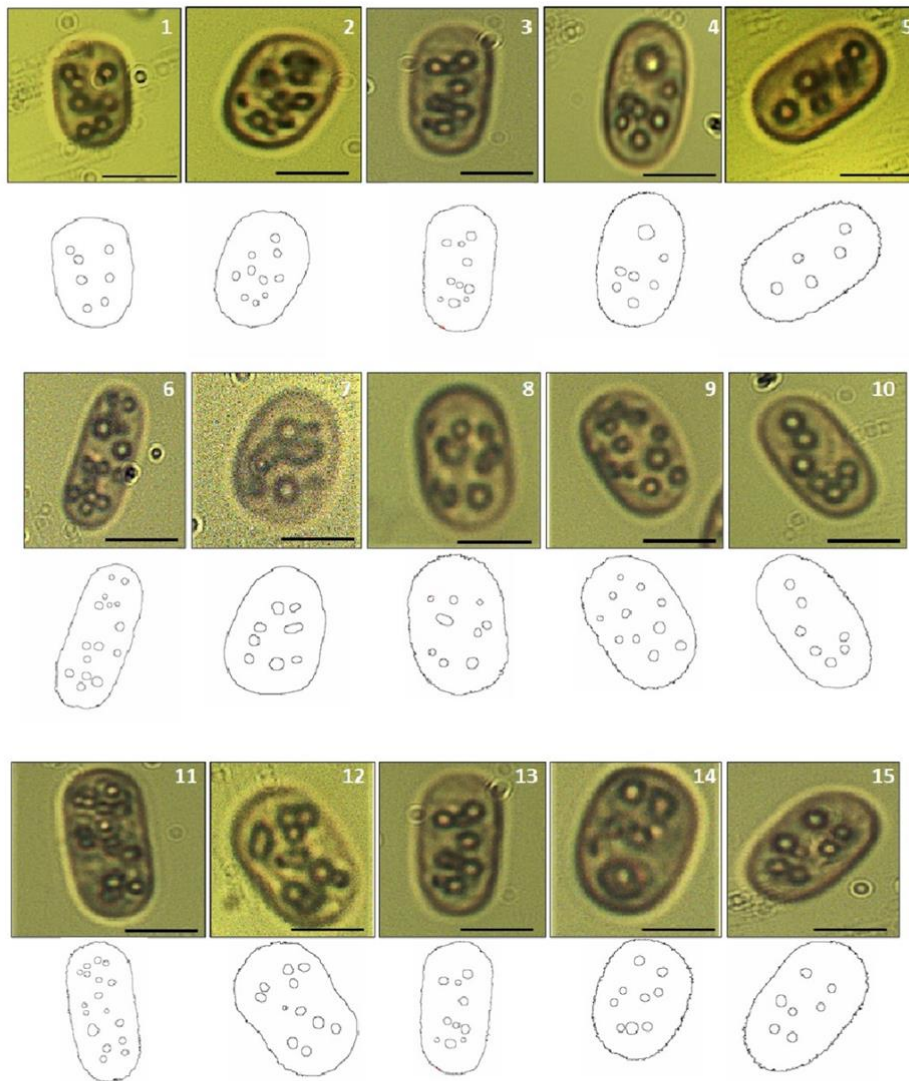

b)

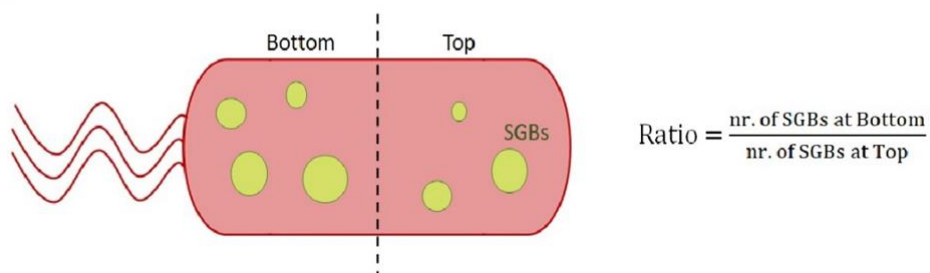

178

179 **Fig S2. Determination of sulfur globules position in wild *C. okenii* cells based on**  
 180 **single-cell microscopy. a)** Top rows show micrographs obtained by light microscopy with  
 181 a 100x objective (Methods) of lake-sampled cells. All micrographs are oriented so that the  
 182 flagella are in the bottom part of the cell. Image analysis was used to extract the contour of  
 183 each cell and the position of single sulfur globules in the cell (bottom rows). Scale bar is 5  
 184  $\mu\text{m}$ . **b)** Schematic of a flagellated cell showing how the calculations were made.

185

186

187  
188  
189

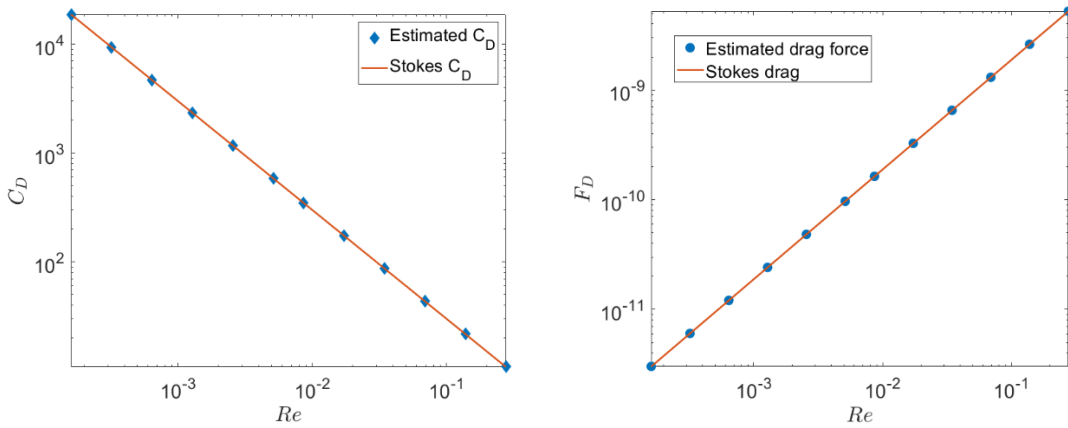

190  
191

192 **Fig S3.** Validation of the COMSOL Multiphysics model for estimation of **a)** coefficient of drag  
193 and **b)** drag force for spheres.

194  
195  
196

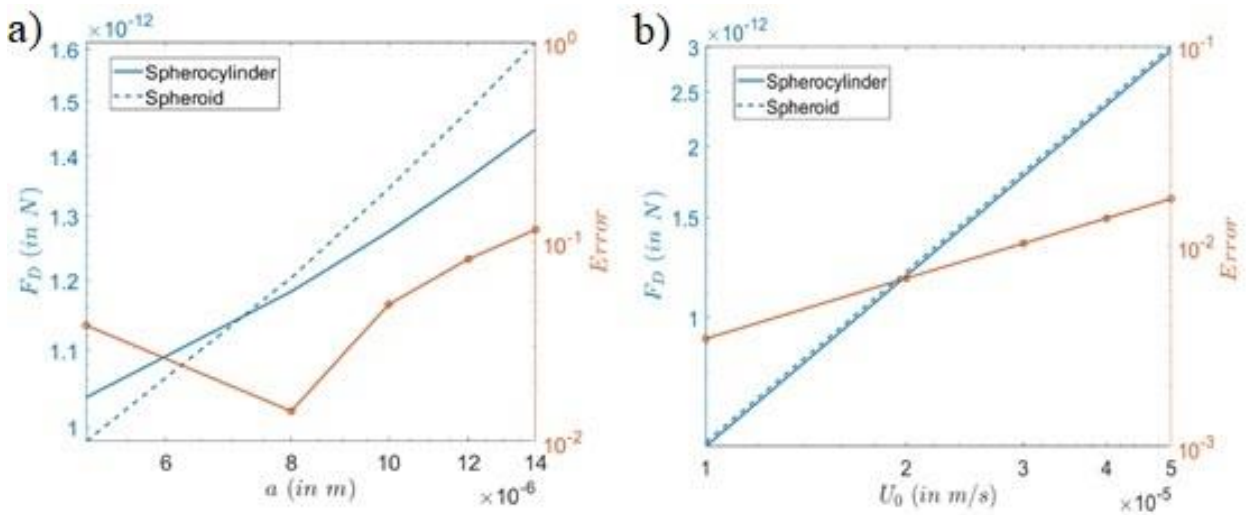

197

198 **Fig S4.** Comparison of drag forces between spherocylinder and spheroid cell geometries  
199 for different **a)** cell aspect ratios and **b)** swimming velocities. Here the spherocylinder aspect  
200 ratio is taken as the ratio between the radius of the spherical cap and the half length of the  
201 central body cylinder.

202  
203  
204

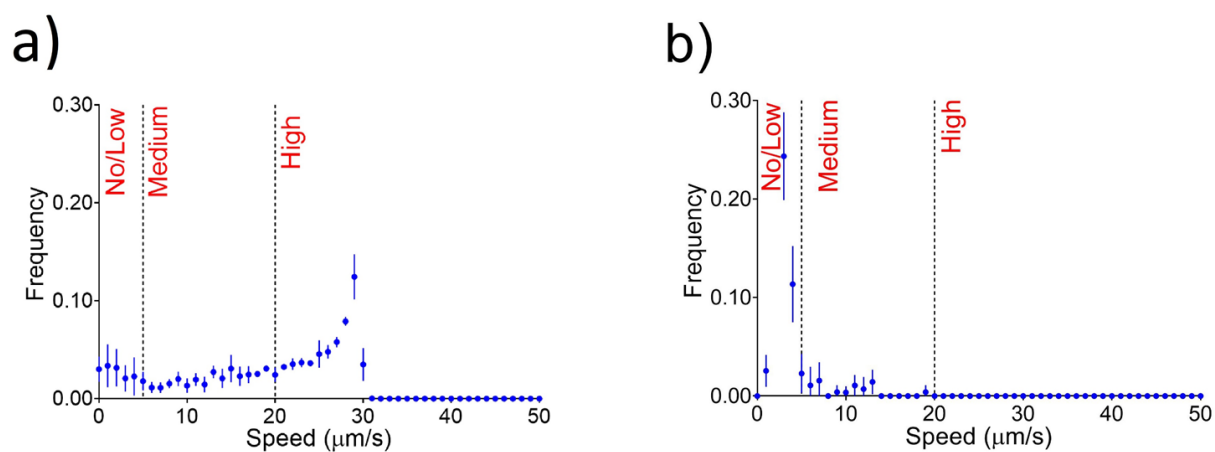

206 **Fig S5.** Histograms of the distribution of speeds of control **a)** and **b)** laboratory-grown cells  
 207 in exponential phase.

208  
 209

210  
 211  
 212

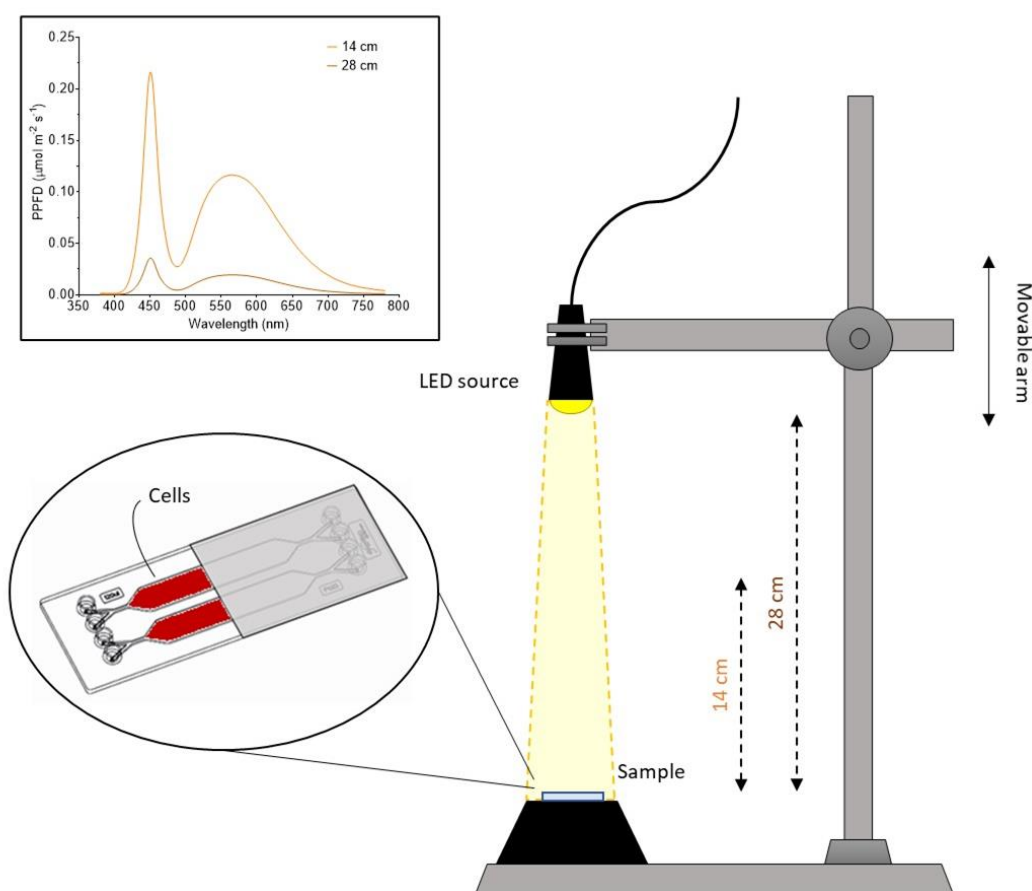

213  
 214  
 215

216 **Fig S6.** Schematic of the microfluidic setup. Inset shows spectra of the LED light source at  
 217 14 and 28 cm distance from the millifluidic chip.

218

219

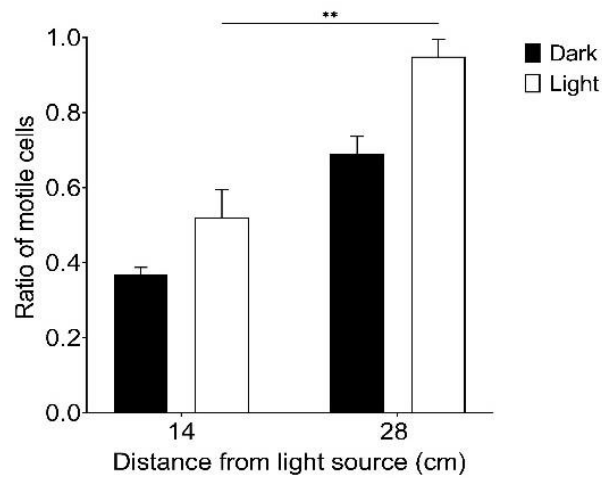

220

221 **Fig S7.** Different distribution of cells between dark and illuminated regions of the millifluidic  
222 device. One-way ANOVA,  $p < 0.01$ ; post hoc Dunnett test; asterisks indicate statistically  
223 significant difference. Error bars represent standard deviation (N=3).

224

225

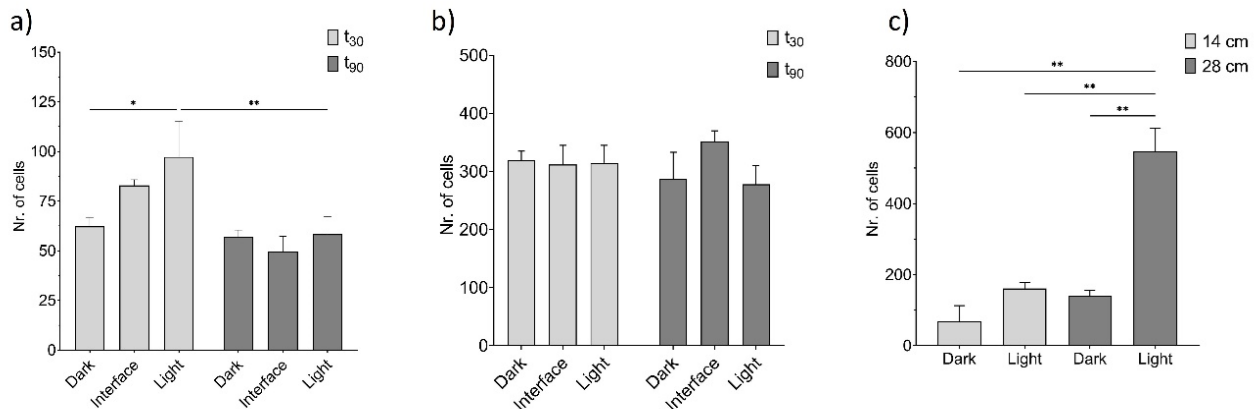

226

227

228 **Fig S8.** Distribution of cells by number in the different sections of the millifluidic device in **a)**  
229 lake-sampled and **b)** laboratory-grown cells in the half shaded-half illuminated experiment  
230 after 30 and 90 minutes. **c)** Distribution of cells by number in the dark and illuminated areas  
231 of the millifluidic device at the two different distances from the point light source. One-way  
232 ANOVA,  $p < 0.01$ ; post hoc Dunnett test; asterisks indicate statistically significant difference.  
233 Error bars represent standard deviation (N=3).

234

235

236

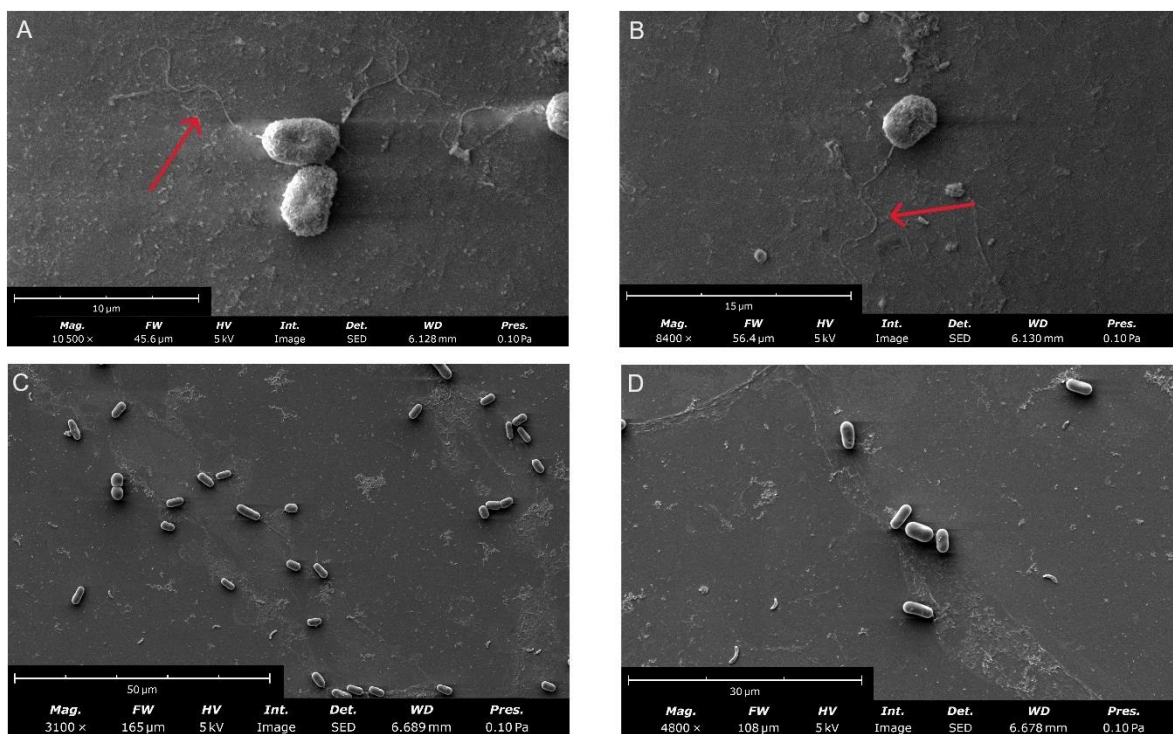

237  
 238 **Fig S9.** Scanning electron microscope images of *C. okenii* cells freshly sampled from the  
 239 lake (a,b) and domesticated cells (c,d). Red arrows indicate the polar flagellar tuft.

240  
 241  
 242  
 243  
 244  
 245

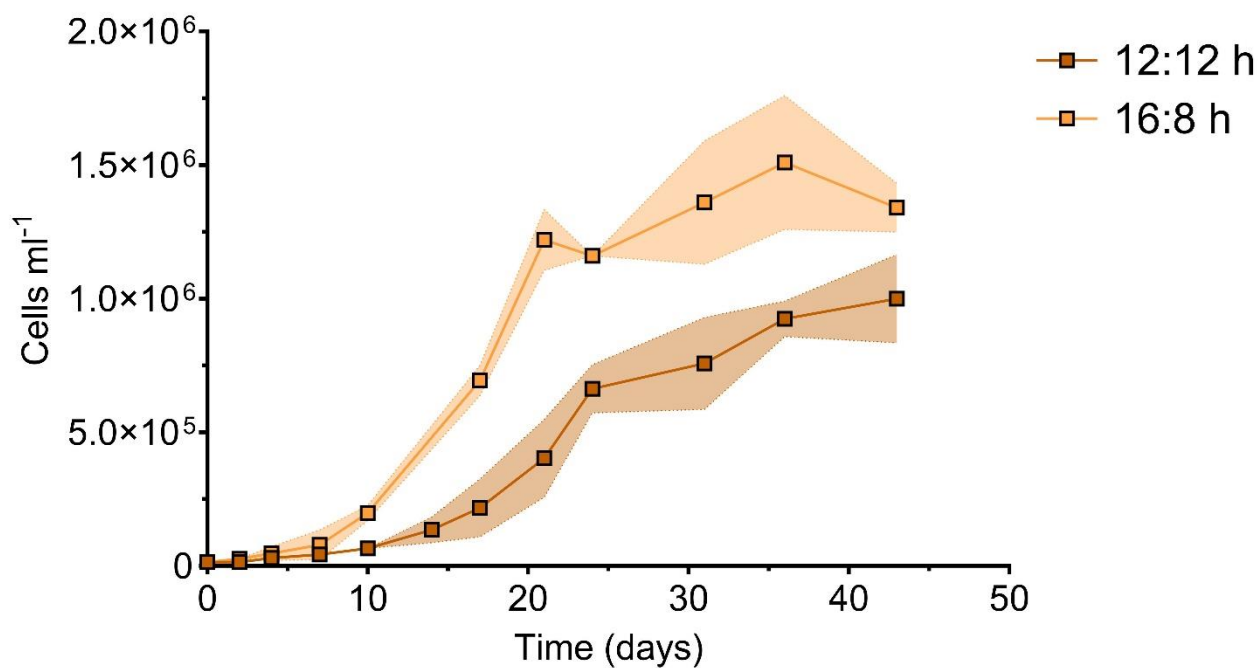

246  
 247 **Fig S10.** Different growth rates observed in *C. okenii* cells grown in the laboratory with two  
 248 different light/dark photoperiods, 12/12 h (brown line) and 16/8 h (orange line).



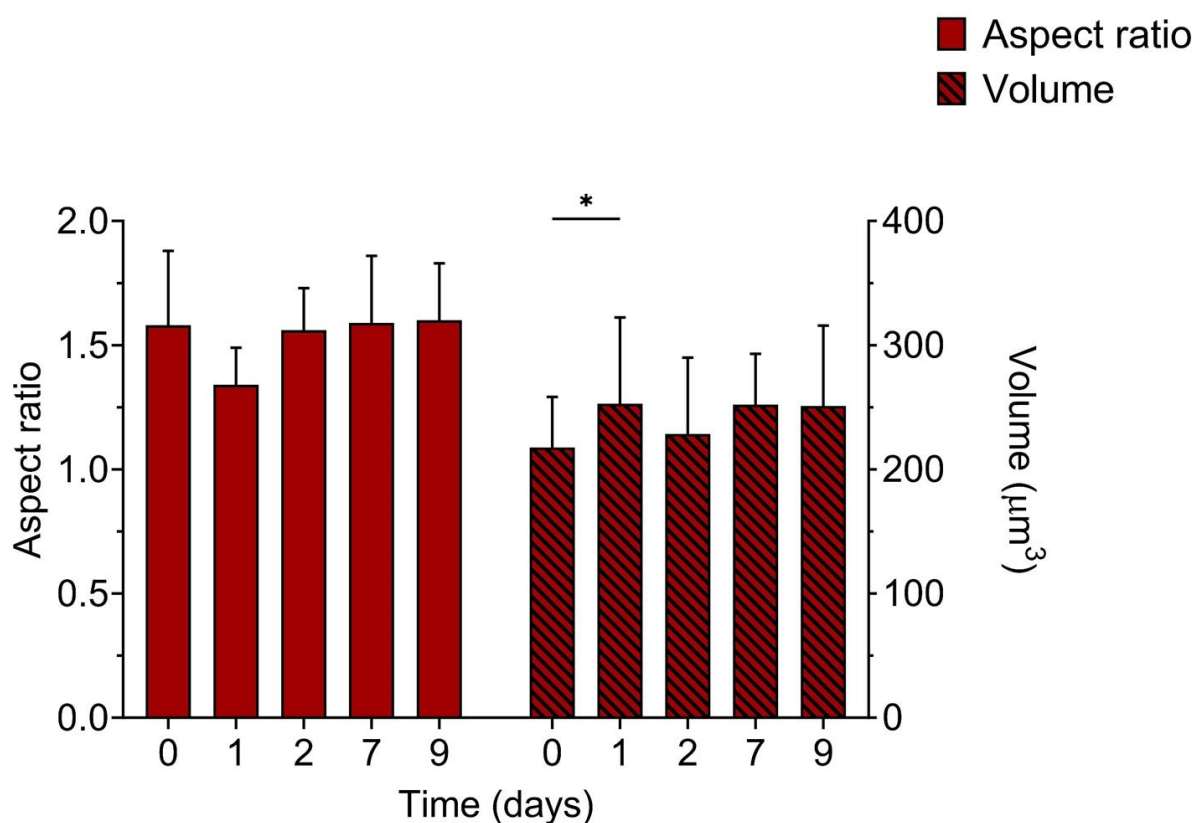

**Fig S11.** Wild *C. okenii* cells exhibit consistency in the main morphological traits across temperature variations (4°C to 20°C) after transition from natural to laboratory environments, as evidenced by aspect ratio and volume measurements. 2-way ANOVA,  $p < 0.01$ ; post hoc Tukey's test. Error bars represent standard deviation (N=20).

249

250 **Table S1.** Parameters ( $\mu\text{m}$ ,  $\pm$  SD) used for modelling mechanics and stability of swimming  
 251 cells.

252

|             | <i>a/b</i>           | <i>L<sub>w</sub></i> | <i>L<sub>w</sub>/a</i> |
|-------------|----------------------|----------------------|------------------------|
| <i>Lake</i> | 1.645 ( $\pm$ 0.292) | 0.379 ( $\pm$ 0.270) | 0.039 ( $\pm$ 0.025)   |
| <i>INC</i>  | 2.231 ( $\pm$ 0.342) | 0.412 ( $\pm$ 0.313) | 0.079 ( $\pm$ 0.063)   |

253
